# Supplementary material
Source: Elsevier journal article supplement (https://www.sciencedirect.com/science/article/pii/S2531137920300055)
Supplement: mmc2 [file S2531137920300055:mmc2.doc]

**Table Supplementary 2.** Primers sequences used in quantitative real-time PCR.

| **Gene** | **Sequence** | | **Length** |
| --- | --- | --- | --- |
| *GUS1* | 5’ GAAAATATGTGGTTGGAGAGCTCATT/  CCGAGTGAAGATCCCCTTTTTA 3’ | 101pb | |
| *GAPDH2* | 5’AGATCCCTCCAAAATCAAGTGG/ GGCAGAGATGATGACCCTTTT 3’ | 130pb | |
| *uc.112* | 5’TGACAGCGAAACACACCTGTA/ CAACACTCTGTGCCCCATTA 3’ | 134pb | |
| *uc.122* | 5’ CAGCTGGGAAATTCTGGAGT/ ACTGACCCACATTTGGACCT 3’ | 116pb | |
| *uc.160* | 5’GGCTTCAATGCACTATTGCA/ AAACCCTCCCTTGCTGACA 3’ | 95pb | |
| *uc.252* | 5’GCTCATCACAGGACCCACA/ AAGCCCAGCCAATTAAGGA 3’ | 97pb | |
| *uc.262* | 5’AGGCTGAGGGTTCCTAATGA/ TGGTAATTGTTGCACCCTCTT 3’ | 110pb | |
| *uc.316* | 5’ATGGCTACATGGGCCATTA/ GCTGTGCAAGATGCACCA 3’ | 108pb | |

1*GUS* primers described by Mata et al., 200639; 2*GAPDH* primers described by Valente et al., 200940.
